# Supplementary material for: Effective and Novel Application of Hydrodynamic Voltammetry to the Study of Superoxide Radical Scavenging by Natural Phenolic Antioxidants
Source: PubMed Central journal article supplement (PMC6356364; doi:10.3390/antiox8010014), 2019-01-04
Supplement: antioxidants-08-00014-s001.pdf [file antioxidants-08-00014-s001.pdf]

## Deposited Figures

**Figure S1** Transition State search for Eriodictyol scavenging of superoxide.

**Figure S2** Minimum reached after approaching superoxide to chrysin H7. The same structure results after approaching HO<sub>2</sub><sup>-</sup> to the H7-excluded chrysin radical.

**Figure S3** Conformation obtained after approaching the minimum shown in Figure 2 to an additional molecule of chrysin (Stick style), left. This  $\pi$ - $\pi$  stacking arrangement is a radical of charge -1. The related minimized product, obtained after posing H<sub>2</sub>O<sub>2</sub> at van der Waals separation from the 2 chrysin moieties, is displayed on the right.

**Figure S4** Avoiding the  $\pi$ - $\pi$  interaction in chrysin. Minimums obtained after geometry optimization of the species shown in Figure S2, line style, posed to another chrysin molecule (stick style), left, and its related product, right.

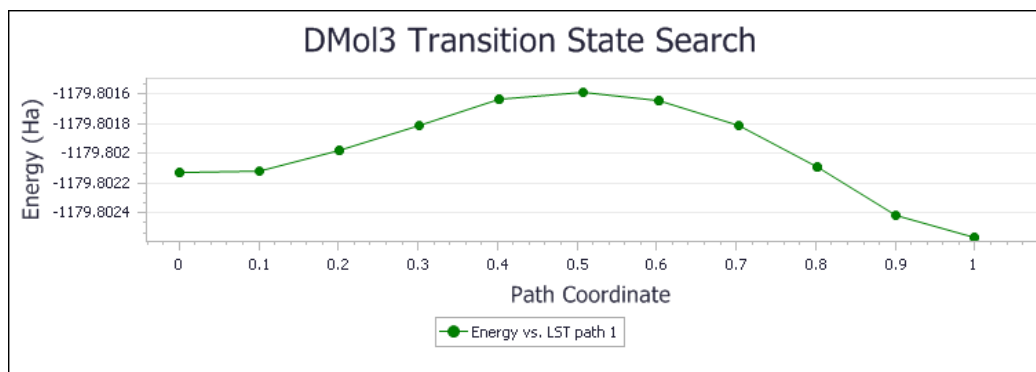

**Figure S1**

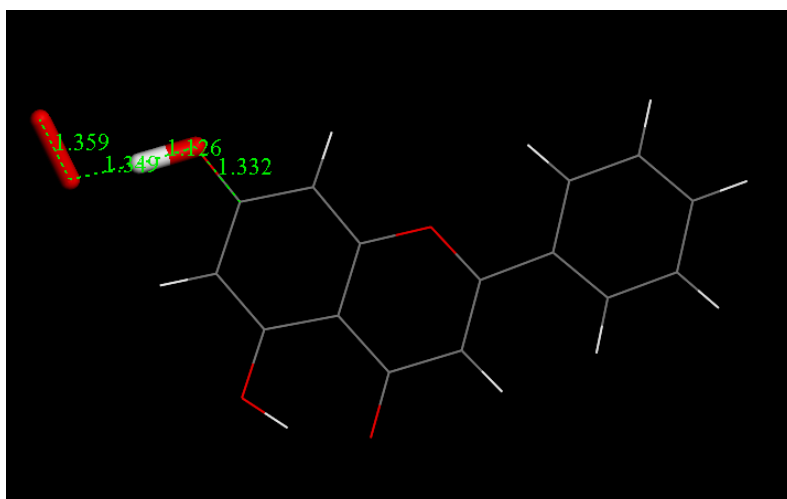

Figure S2

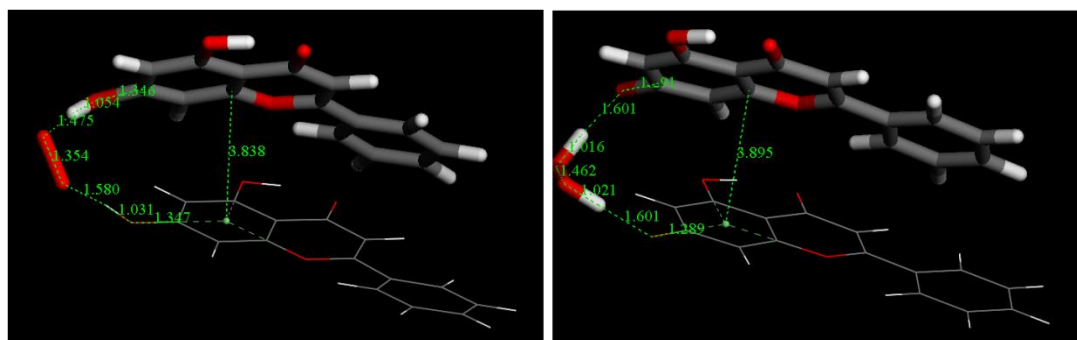

Figure S3

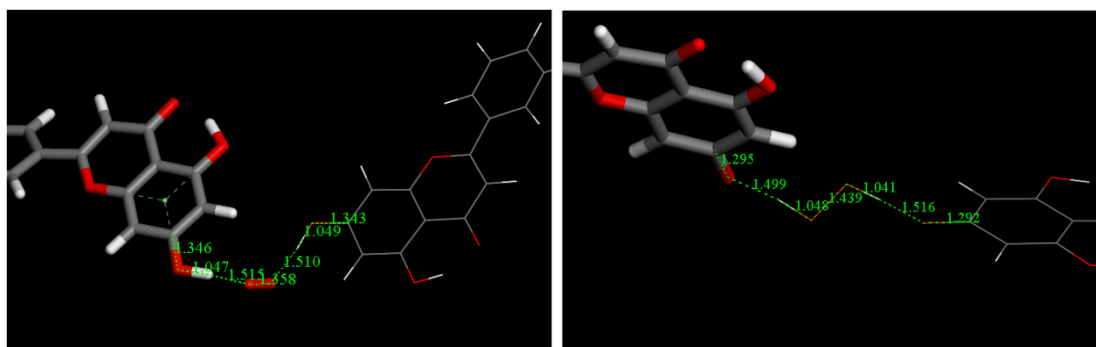

Figure S4
